# Supplementary material
Source: PubMed Central journal article supplement (PMC5007783)
Supplement: AEM.01325-16_zam999117403so1.pdf [file AEM.01325-16_zam999117403so1.pdf]

# Supporting Material

For

## Efficient and regioselective synthesis of $\beta$ -GalNAc/GlcNAc-lactose by a bifunctional transglycosylating $\beta$ -*N*-acetylhexosaminidase from *Bifidobacterium bifidum*

Xiaodi Chen Li Xu Lan Jin Bin Sun Guofeng Gu

Lili Lu\* Min Xiao\*

*State Key Lab of Microbial Technology, National Glycoengineering Research Center,  
Shandong Provincial Key Laboratory of Carbohydrate Chemistry and Glycobiology,  
Shandong University, Jinan 250100, P. R. China*

\*Corresponding author. Fax: +86 531 88365128.

E-mail: lililu@sdu.edu.cn(L. Lu); minxiao@sdu.edu.cn (M. Xiao).

## Table of Contents

|                                                                                                                   |    |
|-------------------------------------------------------------------------------------------------------------------|----|
| 1. Fig. S1 (SDS-PAGE of thirteen recombinant enzymes and TLC analysis of their catalyzed reaction mixtures) ..... | S1 |
| 2. Fig. S2 (Effects of pH and temperature on BbhI activity and stability) .....                                   | S1 |
| 3. Fig. S3–S8 (MS and NMR spectra of GalNAc-Lac) .....                                                            | S2 |
| 4. Fig. S9–S14 (MS and NMR spectra of GlcNAc-Lac) .....                                                           | S5 |
| 5. Fig. S15 (Putative 3D model of BbhI) .....                                                                     | S8 |
| 6. Table S1 (Sequence analysis of thirteen $\beta$ - <i>N</i> -acetylhexosaminidases) .....                       | S9 |

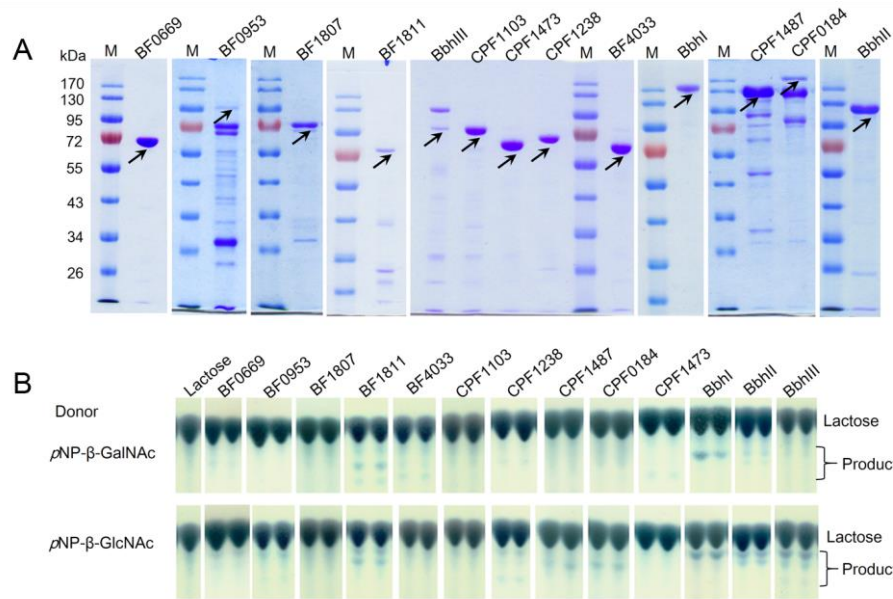

**Fig. S1** SDS-PAGE analysis of thirteen recombinant  $\beta$ -*N*-acetylhexosaminidases purified from *E. coli* (A) and TLC analysis of the reactions by incubation of these enzymes with lactose as acceptor and *pNP*- $\beta$ -GalNAc or *pNP*- $\beta$ -GlcNAc as donors (B). Transglycosylation activities of the purified recombinant enzymes were screened by incubation of 0.5 mg/mL enzymes with 20 mM *pNP*- $\beta$ -GalNAc or *pNP*- $\beta$ -GlcNAc as donors and 200 mM lactose as acceptor at 37 °C for 10 min to 6 h. The reactions were stopped by heating at 100 °C for 10 min and then detected by TLC.

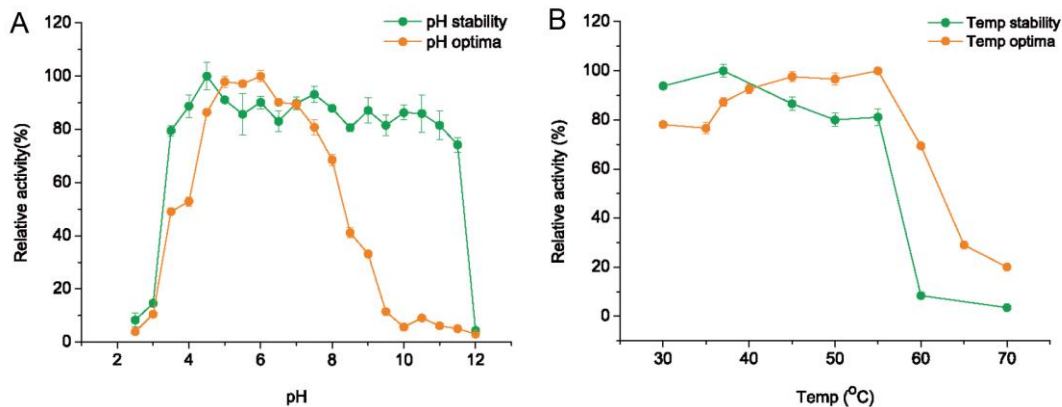

**Fig. S2** Effects of pH (A) and temperature (B) on BbhI activity and stability. The optimal pH was assayed by incubating the enzymes with *pNP*- $\beta$ -GlcNAc in 30 mM buffers from pH 2.5 to 12.0. The effect of pH on enzyme stability was determined by incubation in the same range at 4 °C overnight. The optimal temperature was measured at 30 to 70 °C for 10 min. Thermal stability was studied by assessing enzyme activity after incubation at 30 to 70 °C for 30 min. Data points represent the means  $\pm$  S.D. of three replicates.

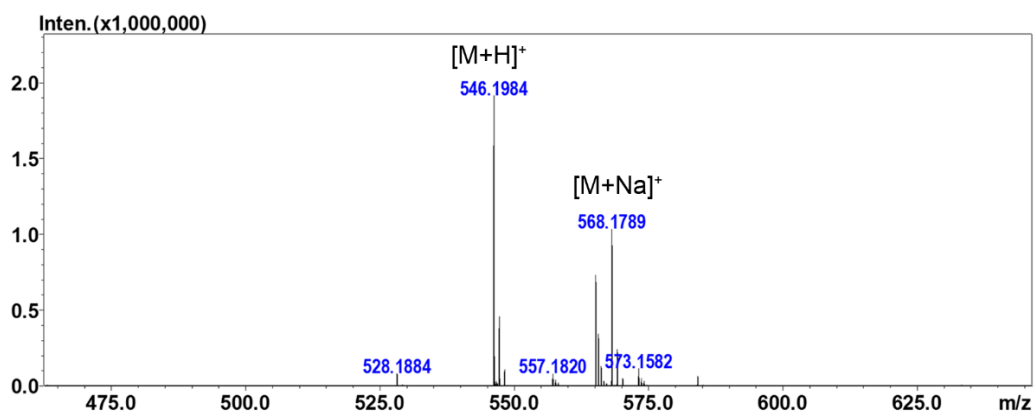

**Fig. S3** MS spectrum of GalNAc $\beta$ 1-3Gal $\beta$ 1-4Glc ( $M_r$  545).

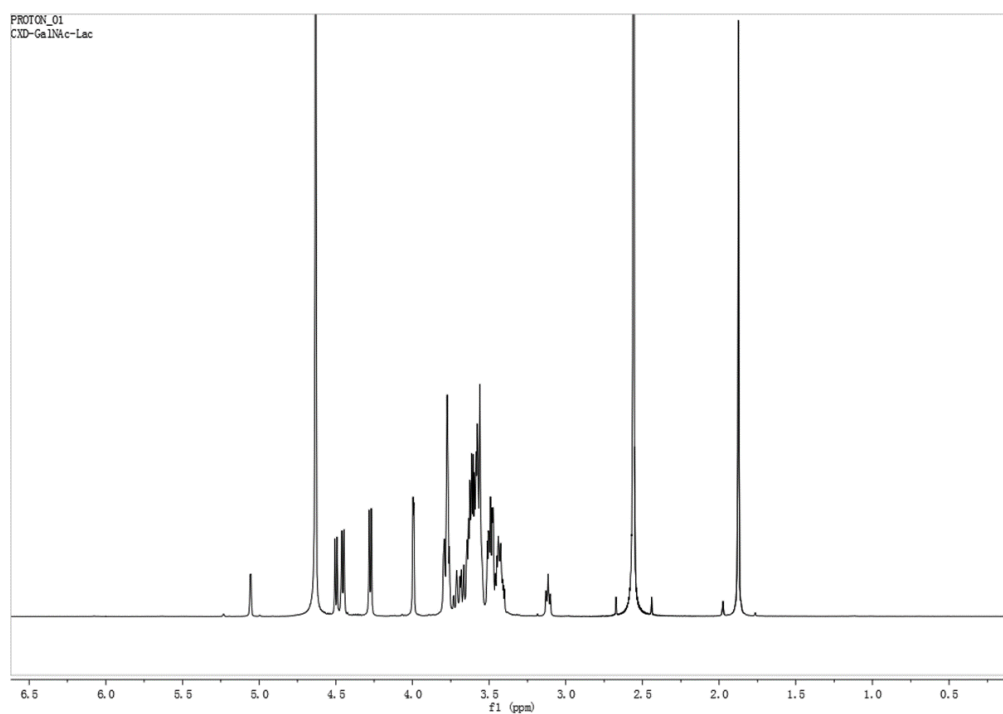

**Fig. S4** <sup>1</sup>H NMR spectrum of GalNAc $\beta$ 1-3Gal $\beta$ 1-4Glc.

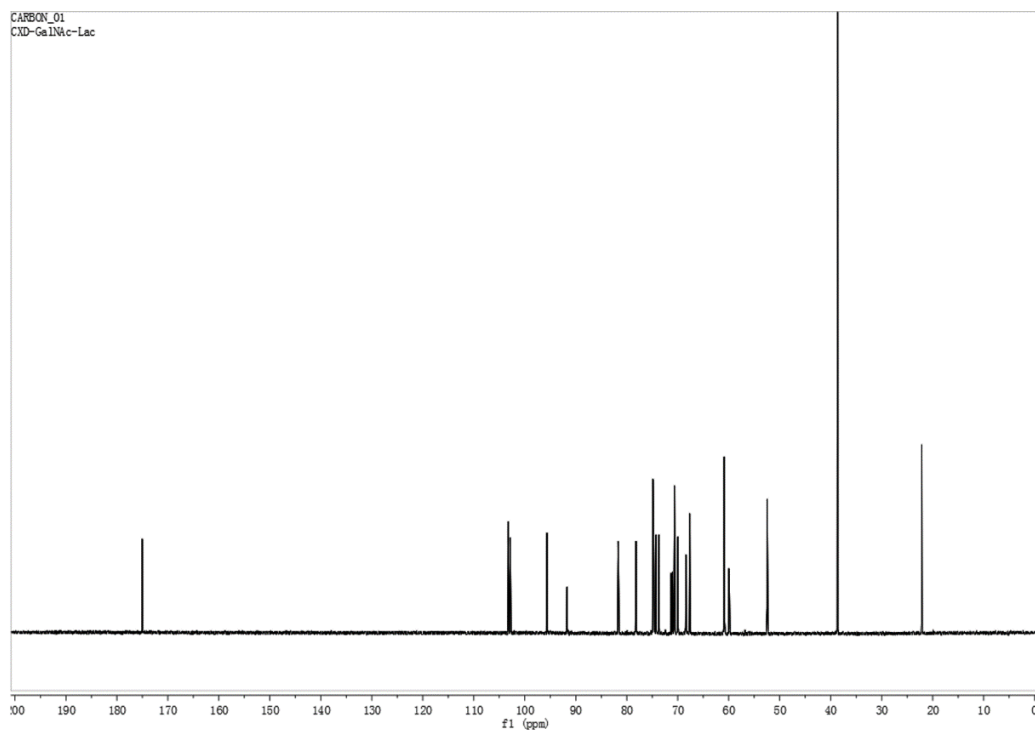

**Fig. S5** <sup>13</sup>C NMR spectrum of GalNAcβ1-3Galβ1-4Glc.

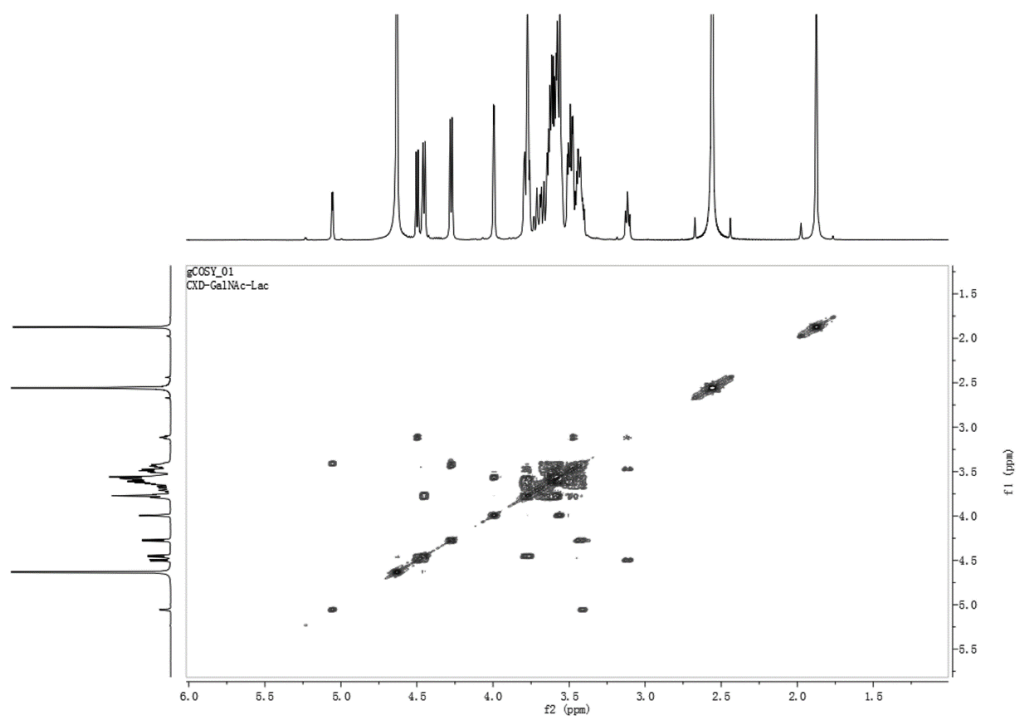

**Fig. S6** COSY spectrum of GalNAcβ1-3Galβ1-4Glc.

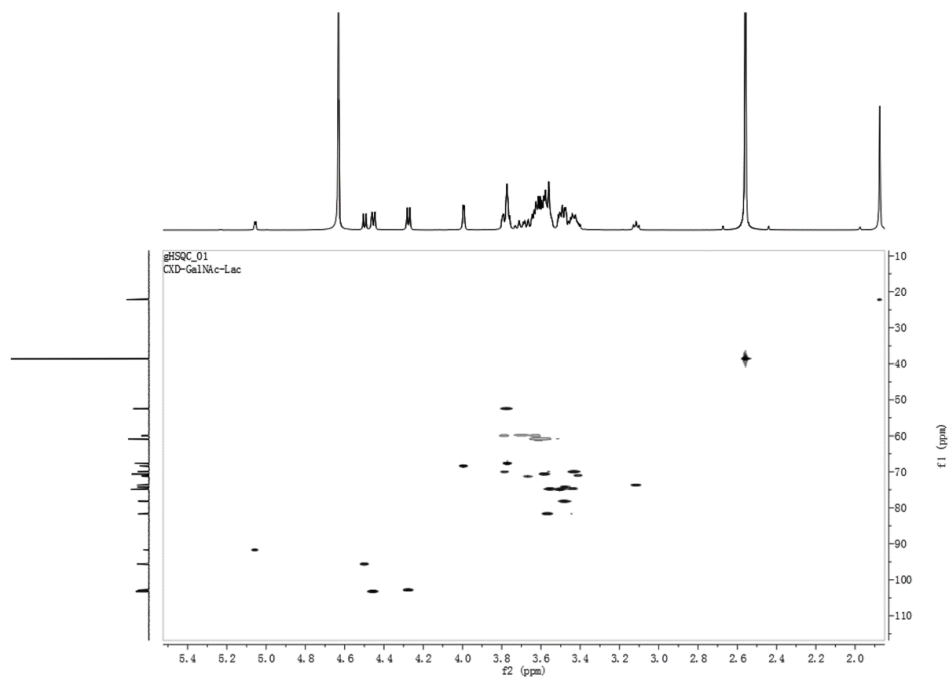

**Fig. S7** HSQC spectrum of GalNAc $\beta$ 1-3Gal $\beta$ 1-4Glc

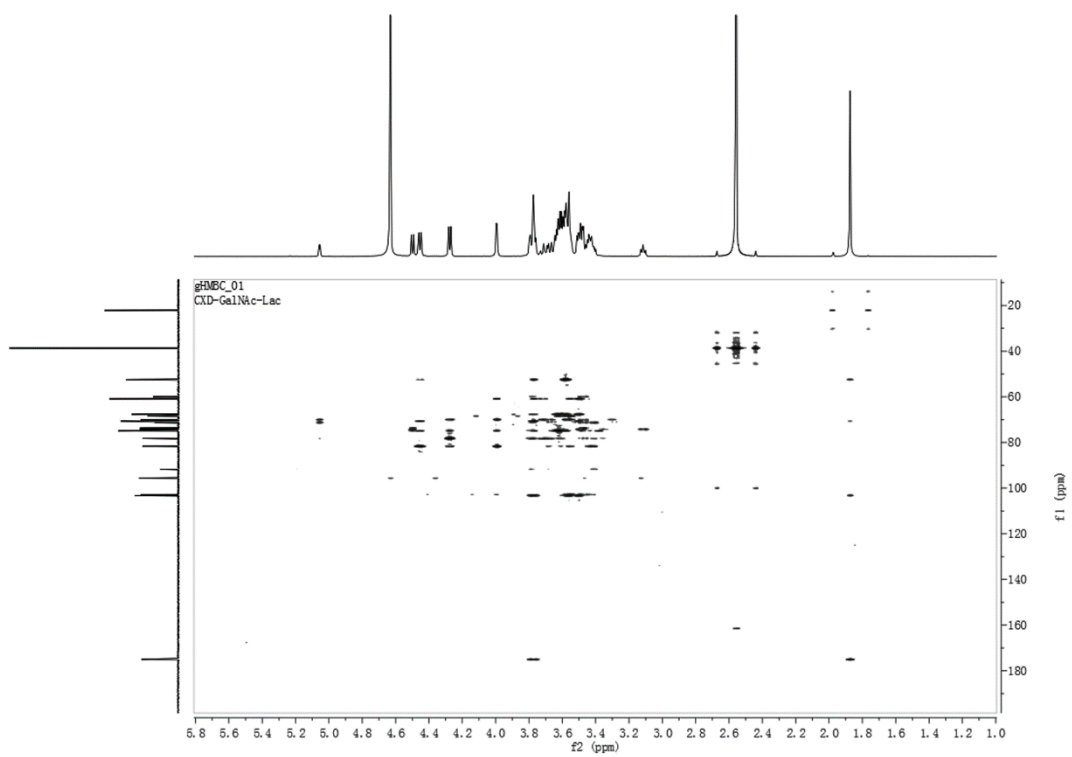

**Fig. S8** HMBC spectrum of GalNAc $\beta$ 1-3Gal $\beta$ 1-4Glc

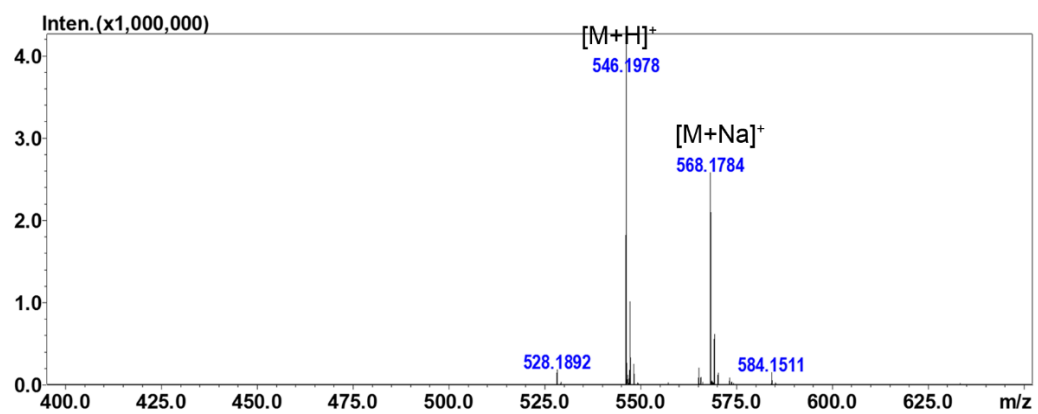

**Fig. S9** MS spectrum of GlcNAc $\beta$ 1-3Gal $\beta$ 1-4Glc ( $M_r$  545).

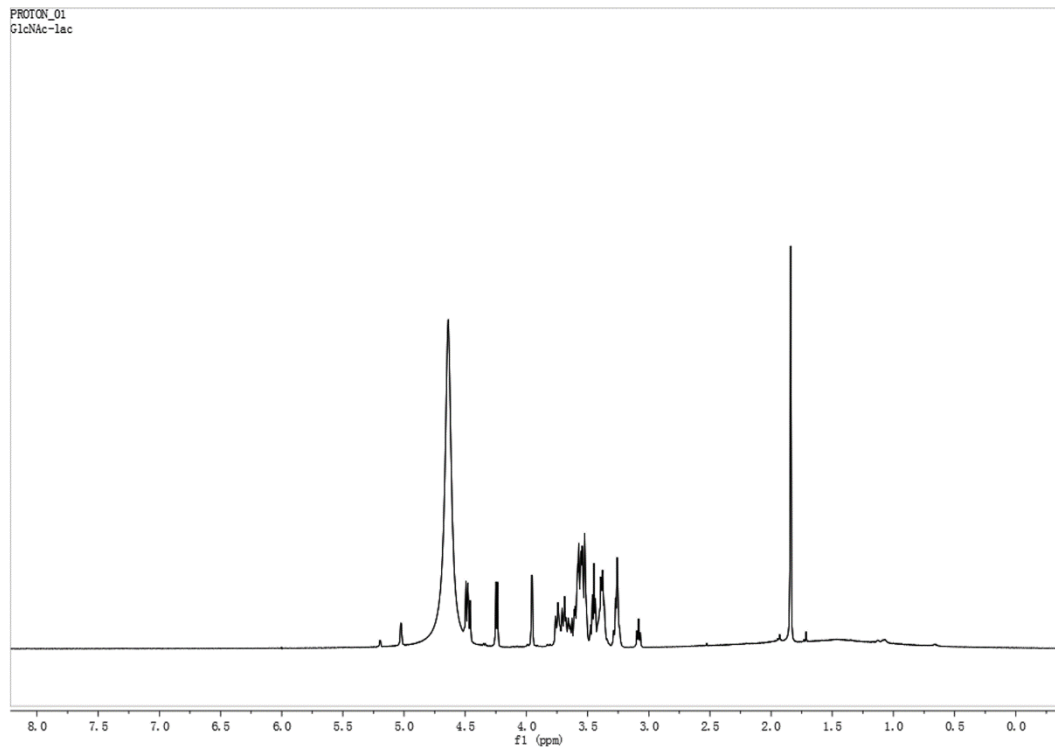

**Fig. S10** <sup>1</sup>H NMR spectrum of GlcNAc $\beta$ 1-3Gal $\beta$ 1-4Glc.

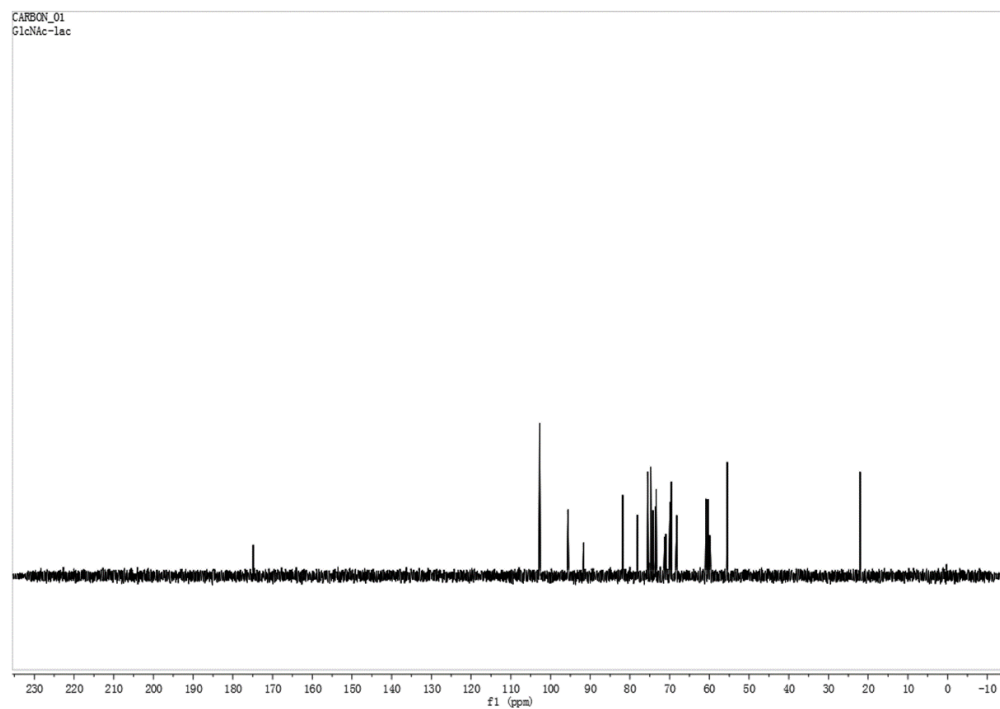

**Fig. S11** <sup>13</sup>C NMR spectrum of GlcNAcβ1-3Galβ1-4Glc.

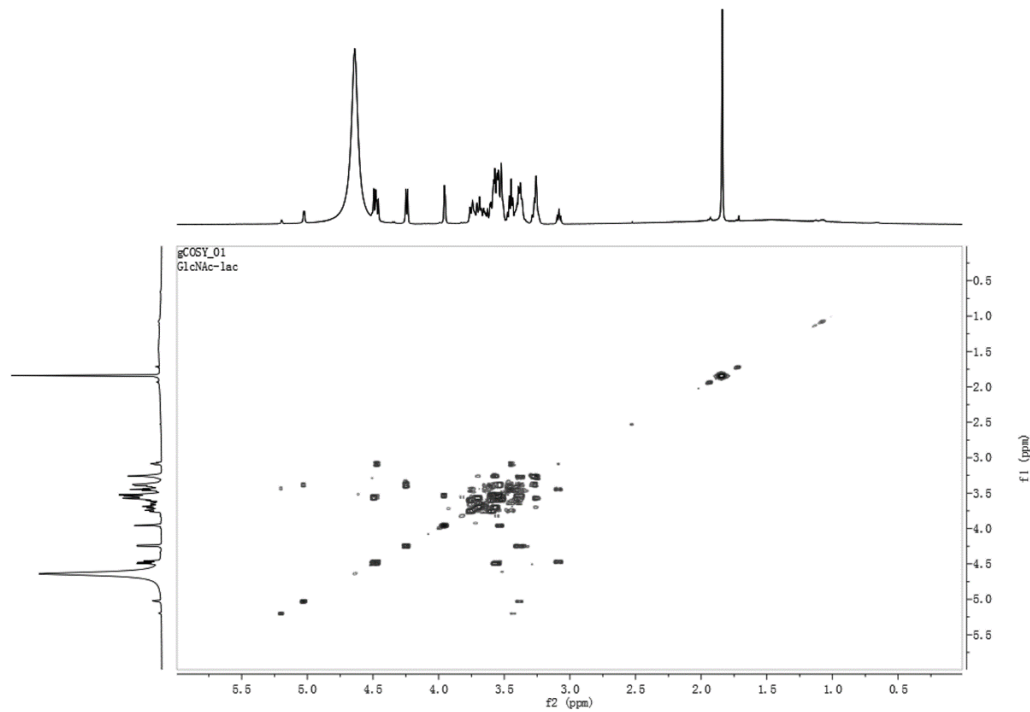

**Fig. S12** COSY spectrum of GlcNAcβ1-3Galβ1-4Glc.

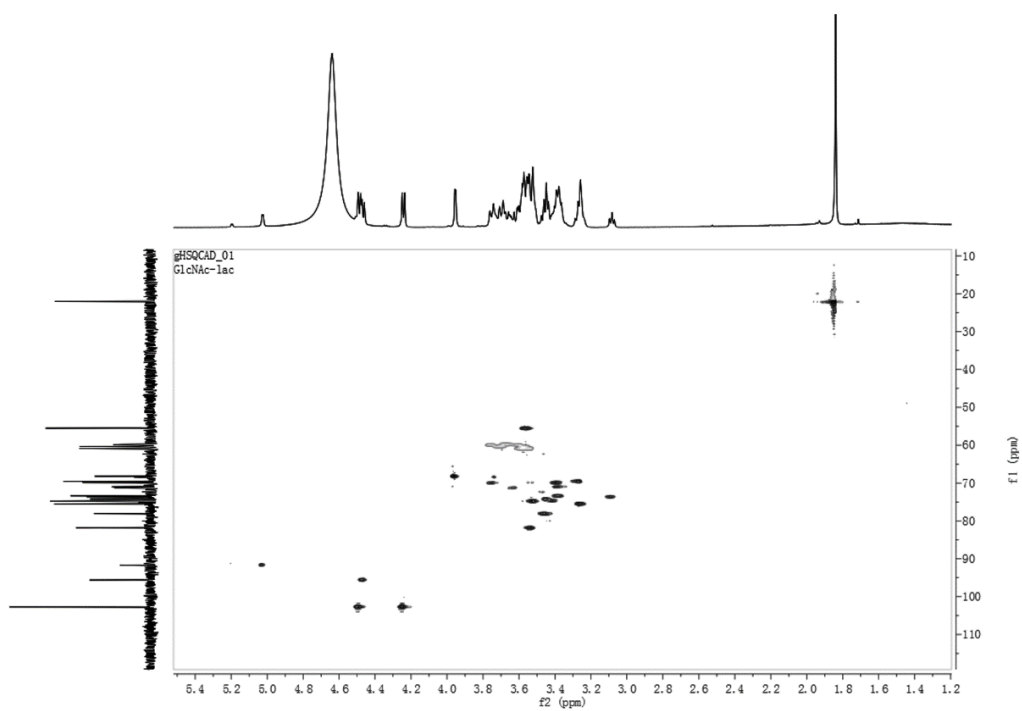

**Fig. S13** HSQC spectrum of GlcNAc $\beta$ 1-3Gal $\beta$ 1-4Glc.

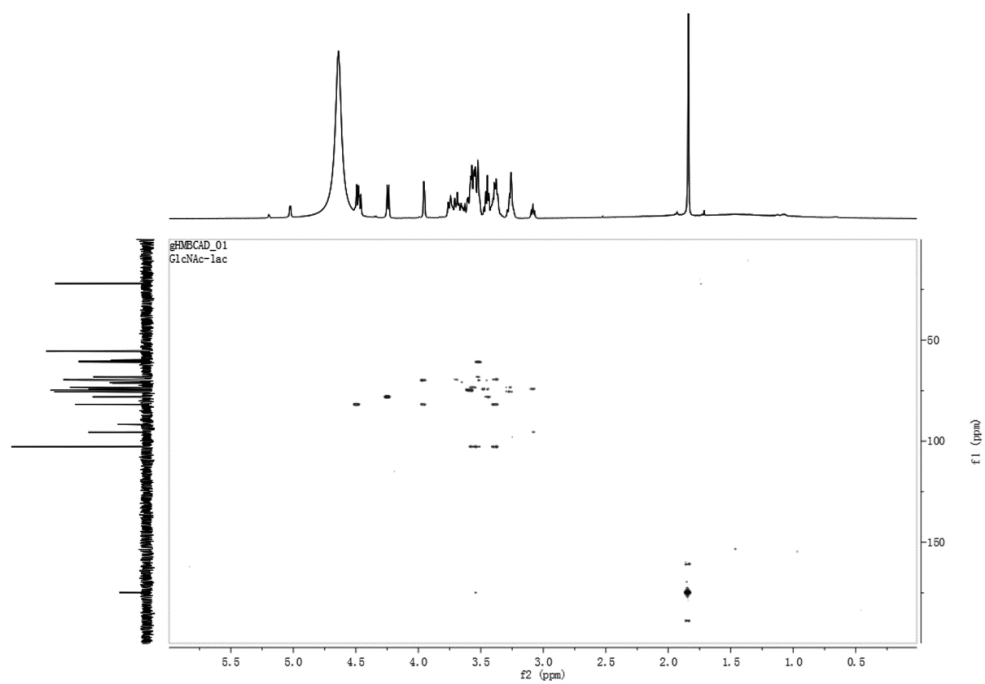

**Fig. S14** HMBC spectrum of GlcNAc $\beta$ 1-3Gal $\beta$ 1-4Glc.



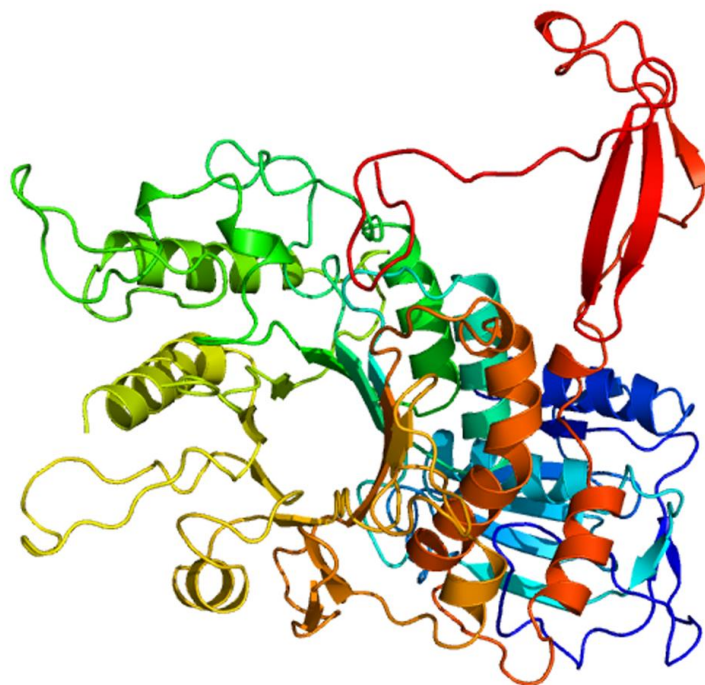

**Fig. S15** Putative 3D model of BbhI. Homology modelling of BbhI was performed with PHYRE2 (<http://www.sbg.bio.ic.ac.uk/phyre2/>), using the structure of *BbLNB*ase from *B. bifidum* JCM 1254 (PDB entry 4h04) as template. Colors from cyan to orange represent *N*-terminus to *C*-terminus.

**Table S1** Sequence analysis of thirteen  $\beta$ -*N*-acetylhexosaminidases

| <b>Enzyme source</b>                    | <b>Signal peptide<sup>a</sup><br/>(Amino acid No.)</b> | <b>Transmembrane region<sup>b</sup><br/>(Amino acid No.)</b> |
|-----------------------------------------|--------------------------------------------------------|--------------------------------------------------------------|
| <b><i>B. fragilis</i> ATCC 25285</b>    |                                                        |                                                              |
| BF0669                                  | 1–23                                                   | 7–26                                                         |
| BF0953                                  | N                                                      | N                                                            |
| BF1807                                  | N                                                      | 7–29                                                         |
| BF1811                                  | N                                                      | N                                                            |
| BF4033                                  | 1–20                                                   | N                                                            |
| <b><i>C. perfringens</i> ATCC 13124</b> |                                                        |                                                              |
| CPF1103                                 | N                                                      | N                                                            |
| CPF1238                                 | N                                                      | N                                                            |
| CPF0184                                 | 1–30                                                   | 13–35                                                        |
| CPF1487                                 | 1–35                                                   | 1145–1167                                                    |
| CPF1473                                 | N                                                      | N                                                            |
| <b><i>B. bifidum</i> JCM 1254</b>       |                                                        |                                                              |
| BbhI                                    | 1–32                                                   | 9–31, 1600–1622                                              |
| BbhII                                   | 1–36                                                   | 7–29, 1033–1055                                              |
| BbhIII                                  | N                                                      | N                                                            |

N, no signal peptide or transmembrane region

a, Signal peptide was predicted using online tools (<http://www.cbs.dtu.dk/services/SignalP/>).

b, Transmembrane region was predicted using online tools (<http://www.cbs.dtu.dk/services/TMHMM/>)
